# Supplementary material for: ALKBH5 facilitates CYP1B1 mRNA degradation via m6A demethylation to alleviate MSC senescence and osteoarthritis progression
Source: Springer Nature journal article supplement (doi:10.1038/s12276-023-01059-0), 2023-08-01
Supplement: MOESM1 [file 12276_2023_1059_MOESM1_ESM.pdf]

Supplementary Figures

Supplementary Fig. 1

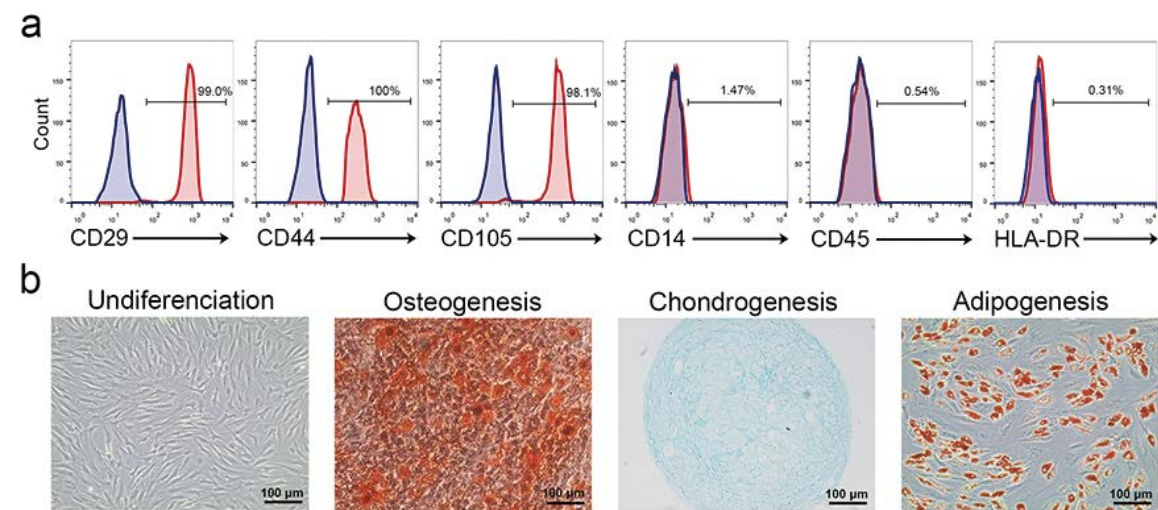

Supplementary Fig. 2

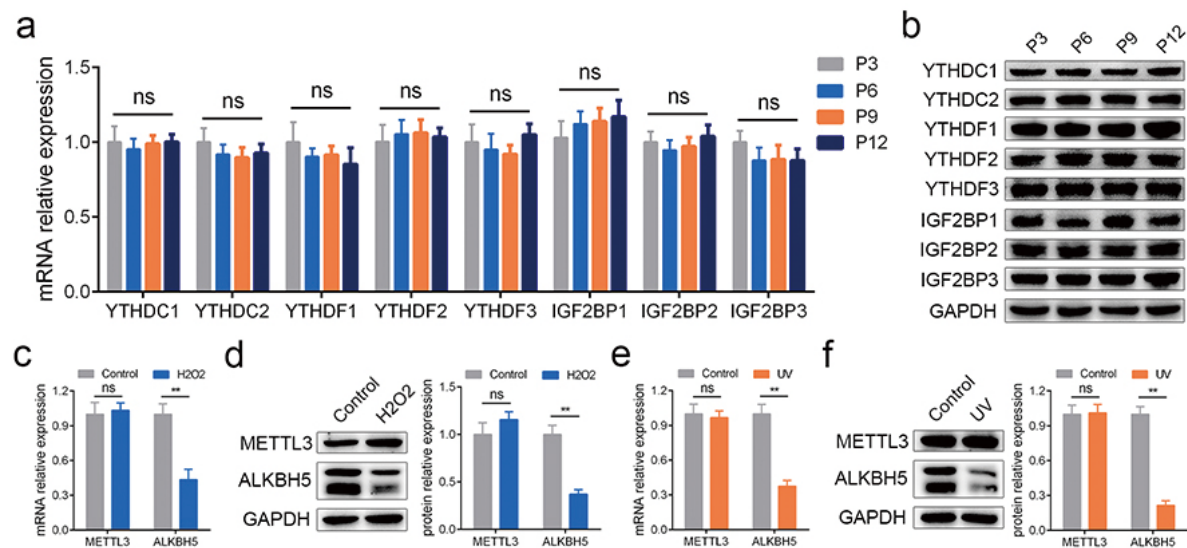

**Supplementary Fig. 3**

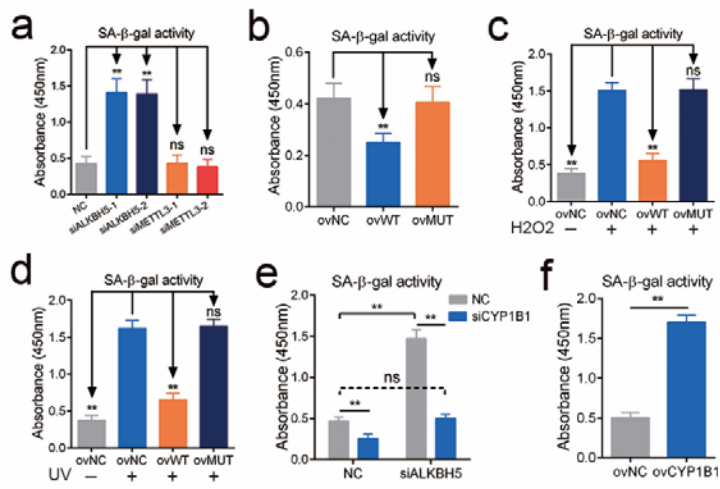

**Supplementary Fig. 4**

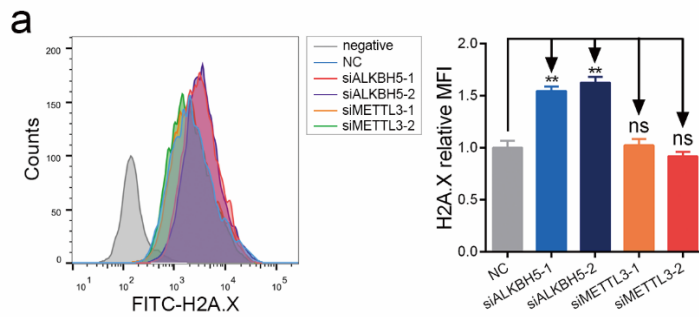

**Supplementary Fig. 5**

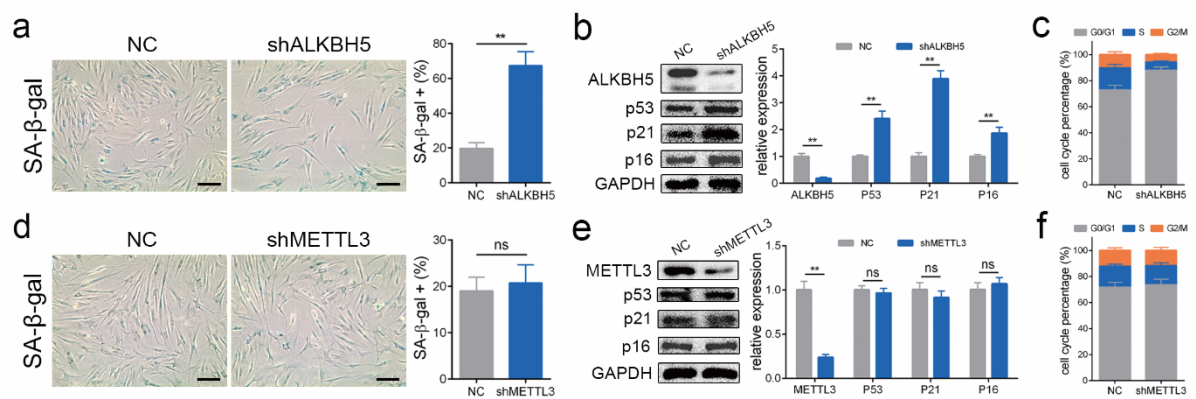

Supplementary Fig. 6

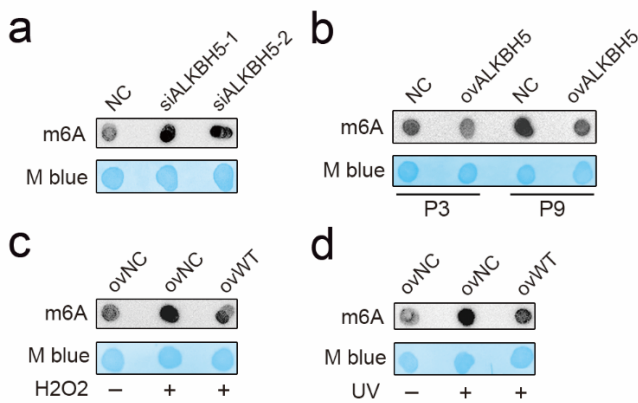

Supplementary Fig. 7

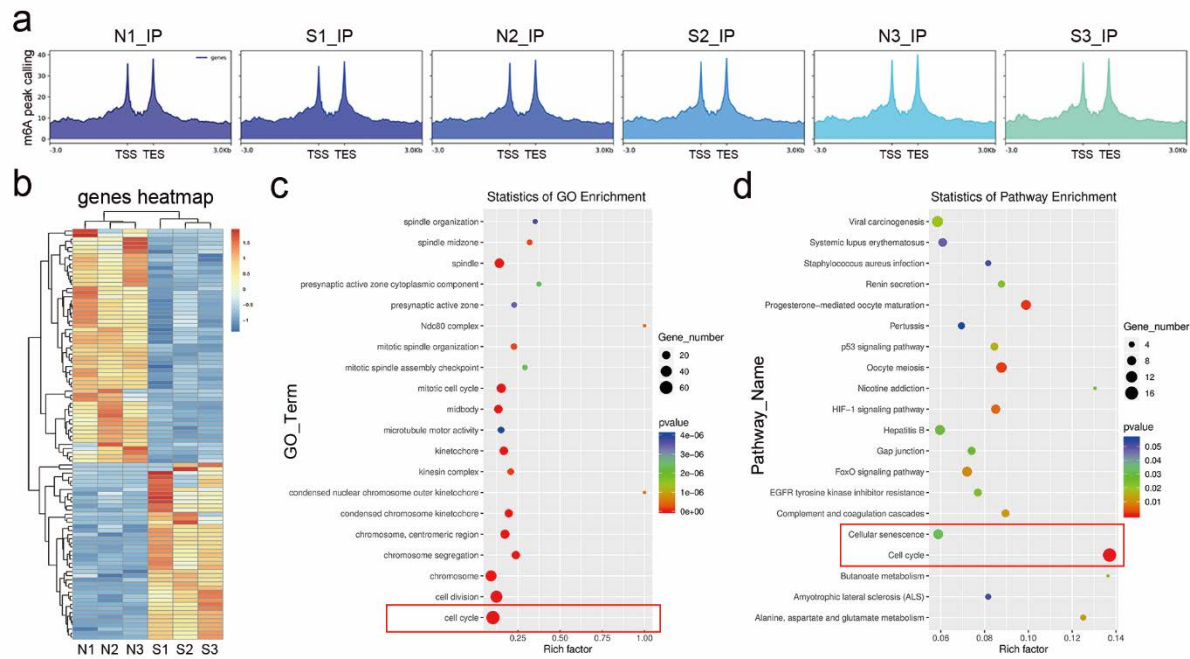

**Supplementary Fig. 8**

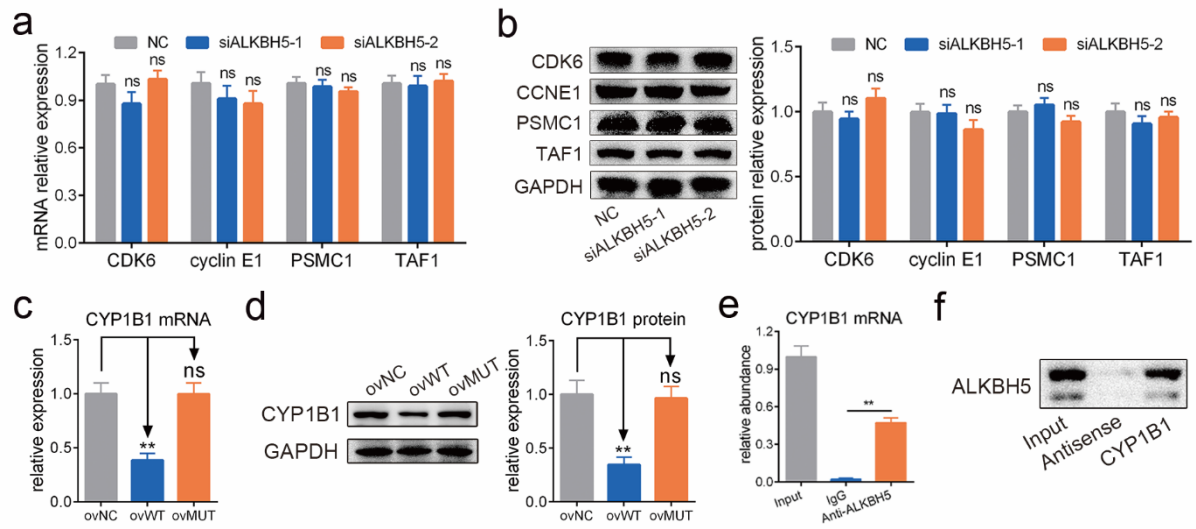

**Supplementary Fig. 9**

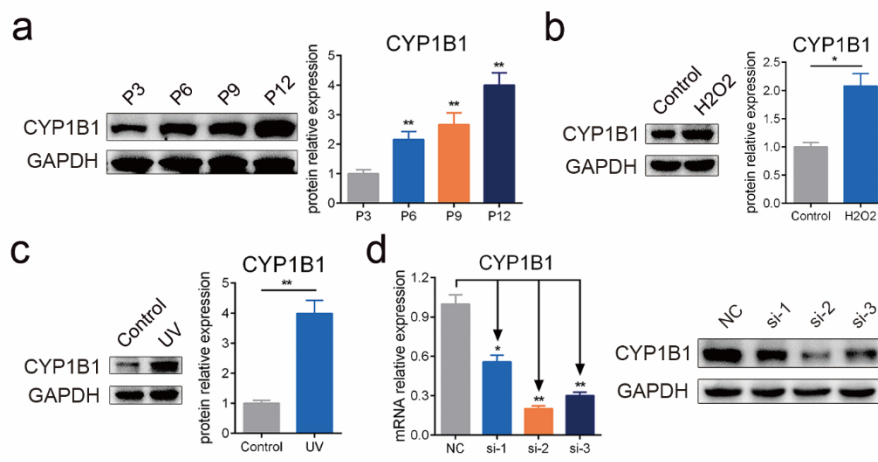

**Supplementary Fig. 10**

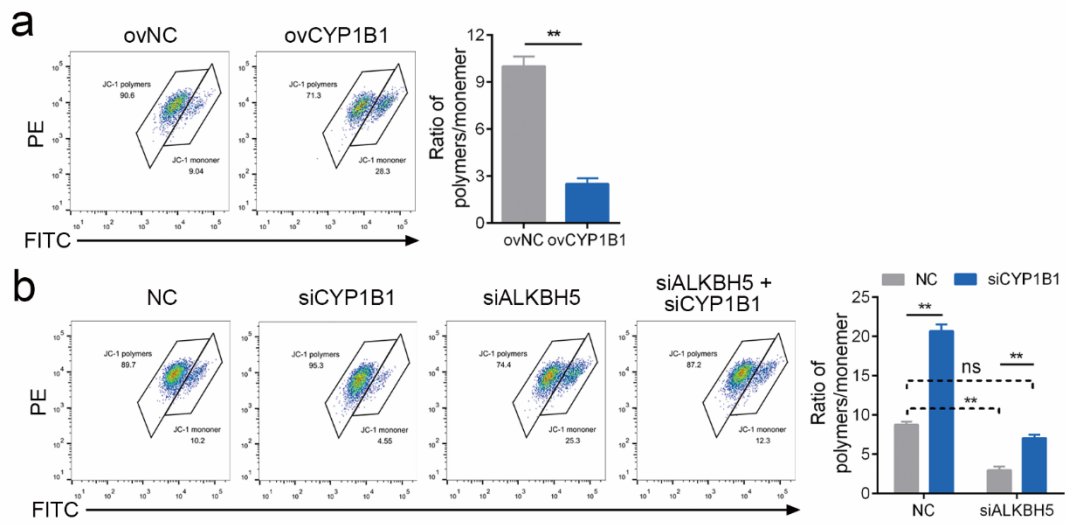

**Supplementary Fig. 11**

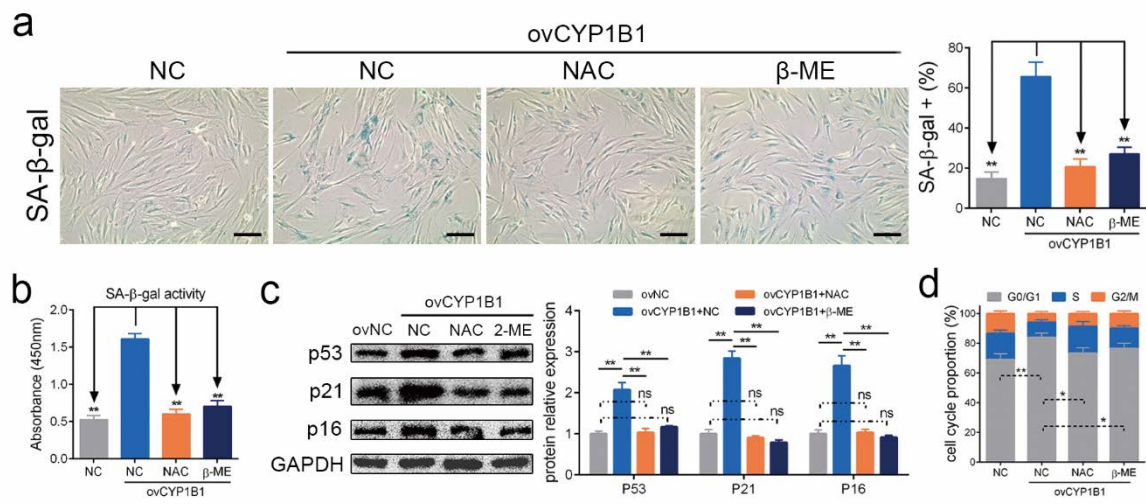

**Supplementary Fig. 12**

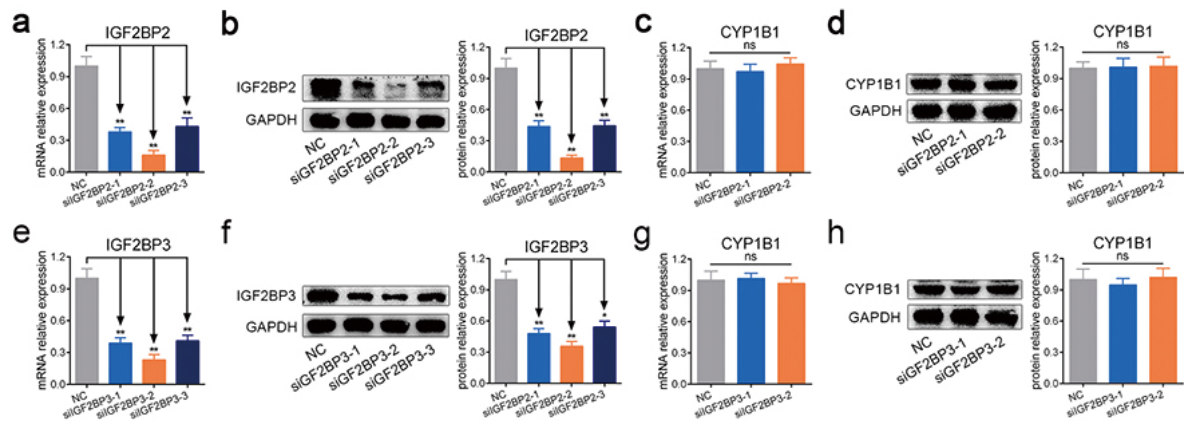

**Supplementary Fig. 13**

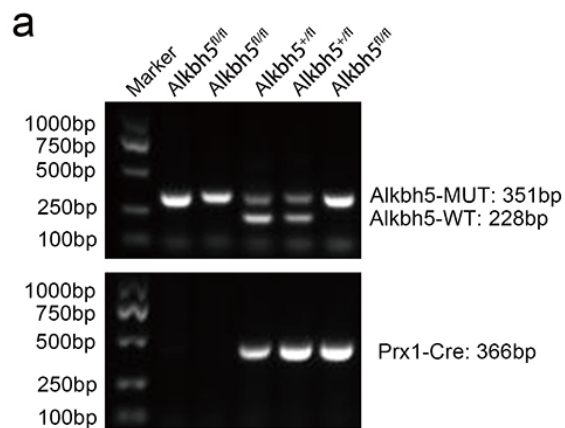

**Supplementary Fig. 14**

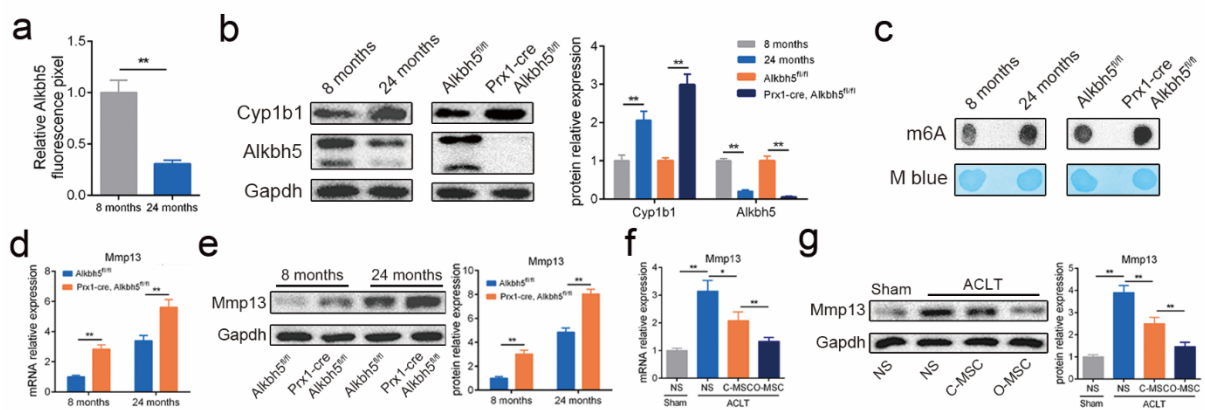

## Supplementary Tables

**Supplementary Table 1. Primers used for qRT-PCR**

| Gene    | Forward primer (5' - 3') | Reverse primer (5' - 3') |
|---------|--------------------------|--------------------------|
| GAPDH   | GGAGCGAGATCCCTCCAAAAT    | GGCTGTTGTCATACTTCTCATGG  |
| METTL3  | TTGTCTCCAACCTTCCGTAGT    | CCAGATCAGAGAGGTGGTGTAG   |
| METTL14 | GAACACAGAGCTTAAATCCCCA   | TGTCAGCTAAACCTACATCCCTG  |
| WTAP    | ACTGGCCTAAGAGAGTCTGAAG   | GTTGCTAGTCGCATTACAAGGA   |
| FTO     | GCTGCTTATTTCTGGGACCTG    | AGCCTGGATTACCAATGAGGA    |
| ALKBH5  | CGGCGAAGGCTACACTTACG     | CCACCAGCTTTTGGATCACCA    |
| YTHDC1  | CTTCTGATGAGCAAGGGAACAA   | GGCCTCACTTCGAGTGTCTATAA  |
| YTHDC2  | CAAAACATGCTGTTAGGAGCCT   | CCACTTGTCTTGCTCATTTCCT   |
| YTHDF1  | ACCTGTCCAGCTATTACCCG     | TGGTGAGGTATGGAATCGGAG    |
| YTHDF2  | CCTTAGGTGGAGCCATGATTG    | TCTGTGCTACCCAACTTCAGT    |
| YTHDF3  | GGTGTATTTAGTCAACCTGGGG   | AAGAGAACTAGGTGGATAGCCAT  |
| IGF2BP1 | GGCCATCGAGAATTGTTGCAG    | CCAGGGATCAGGTGAGACTG     |
| IGF2BP2 | AGCTAAGCGGGCATCAGTTTG    | CCGCAGCGGGAAATCAATCT     |
| IGF2BP3 | TATATCGGAAACCTCAGCGAGA   | GGACCGAGTGCTCAACTTCT     |
| CYP1B1  | CACCTCTGTCTTGGGCTACC     | TTCGCAGGCTCATTGTTGGTT    |
| CDK6    | CCAGATGGCTCTAACCTCAGT    | AACTTCCACGAAAAAGAGGCTT   |
| CCNE1   | AAGGAGCGGGACACCATGA      | ACGGTCACGTTTGCCTTCC      |
| PSMC1   | ACGGGAATTGTTCCGAGTTG     | CTTTTTGTCCCAATGGCGTCA    |

---

|          |                          |                          |
|----------|--------------------------|--------------------------|
| PSMF1    | GTGGTGACACACGGTTACTTC    | ATACCGGAGGACATACAGGTC    |
| Alkbh5   | CAGGTTTGAAGTGGCCATAGTAGC | GAGGCCAAGACAGGAGAATCAGAC |
| Mmp13    | CTTTGGCTTAGAGGTGACTGG    | AGGCACTCCACATCTTGTTT     |
| Prx1-Cre | GCTCTGATGTTGGCAAAGGGGT   | AACATCTTCAGGTTCTGCGGG    |

---

**Supplementary Table 2. siRNAs used for RNA interference**

| Target Gene | siRNA name | siRNA sequence (5' - 3') |
|-------------|------------|--------------------------|
| Control     | NC         | UUCUCCGAACGUGUCACGUTT    |
| ALKBH5      | si-1       | GCUUCAGCUCUGAGAACUATT    |
| ALKBH5      | si-2       | GACUGUGCUCAGUGGAUAUTT    |
| ALKBH5      | si-3       | GCUAUGCUUCAGAUCGCCUTT    |
| METTL3      | si-1       | GCUACCUGGACGUCAGUAUTT    |
| METTL3      | si-2       | GGUUGGUGUCAAGGAAAUTT     |
| METTL3      | si-3       | GGUGACUGCUCUUUCCUUATT    |
| CYP1B1      | si-1       | GCAGACCACGCUCCUGCUATT    |
| CYP1B1      | si-2       | CCCACAGCAUGAUGCGCAATT    |
| CYP1B1      | si-3       | GCAACUUCAUCCUGGACAATT    |
| IGF2BP1     | si-1       | CCCAGUAUGUGGGUGCCAUTT    |
| IGF2BP1     | si-2       | CCAAAGUUCGUAUGGUUAUTT    |
| IGF2BP1     | si-3       | UGGAAUAGGUGACAUUCACTT    |
| IGF2BP2     | si-1       | CUCUCGGGUAAAGUGGAAUTT    |
| IGF2BP2     | si-2       | GUCAACGUCACAU AUGCAATT   |
| IGF2BP2     | si-3       | AUGAUUUCAAGAAUCAUGCTT    |
| IGF2BP3     | si-1       | GCUGCUGAGAAGUCGAUUATT    |
| IGF2BP3     | si-2       | CGGUGAAUGAACUUCAGAATT    |
| IGF2BP3     | si-3       | AAAAUAACGAGAAAAAACGTT    |

## **Supplemental Materials and Methods**

### ***Primary antibodies used in western blots***

Anti-p53 (Cell Signaling Technology, 2524S, 1:1,000), anti-p21 (Cell Signaling Technology, 2947S, 1:1,000), anti-p16 (Cell Signaling Technology, 80772S, 1:1,000), anti-METTTL3 (Abcam, ab195352, 1:1,000), anti-METTTL14 (Abcam, ab98166, 1:1,000), anti-WTAP (Abcam, ab195380, 1:1,000), anti-FTO (Abcam, ab92821, 1:1,000), anti-ALKBH5 (Abcam, ab195377, 1:1,000), anti-IGF2BP1 (Abcam, ab184305, 1:1,000), anti-IGF2BP2 (Abcam, ab128175, 1:1,000), anti-IGF2BP3 (Abcam, ab177477, 1:1,000), anti-CDK6 (Abcam, ab124821, 1:50,000), anti-CYP1B1 (Abcam, ab185954, 1:2,000), anti-CCNE1 (Abcam, ab33911, 1:1,000), anti-PSMC1 (Bethyl, A303-820A-T, 1:1,000), anti-PSMF1 (Bethyl, A303-859A-T, 1:1,000), and anti-GAPDH (CW BIO, CW0100M, 1:3,000) were used.

### ***Primary antibodies used in immunofluorescence***

Anti-CD90 (Proteintech, 66766-1-Ig, 1:100), anti-ALKBH5 (Proteintech, 16837-1-AP, 1:100), anti-p-H2A.X (Cell Signaling Technology, 9718T, 1:400), and anti-MMP13 (Abcam, ab219620, 1:250) were used.

## Supplemental Figure Legends

**Supplementary Fig. 1.** Identification of MSCs. **a.** The results of flow cytometry showed that the isolated MSCs were positive for CD29, CD44 and CD105 but not CD14, CD45 or HLA-DR; **b.** The undifferentiated MSCs were spindle-shaped and successfully differentiated into osteoblasts, chondroblasts and adipocytes. n = 3.

**Supplementary Fig. 2.** The expression of m6A-related genes in senescent MSCs.

**a.** The mRNA levels of m6A readers in different generations of MSCs; **b.** The protein levels of m6A readers in different generations of MSCs; **c.** H<sub>2</sub>O<sub>2</sub> treatment decreased the mRNA level of ALKBH5 but not METTL3; **d.** H<sub>2</sub>O<sub>2</sub> treatment decreased the protein level of ALKBH5 but not METTL3; **e.** UV irradiation decreased the mRNA level of ALKBH5 but not METTL3; **f.** UV irradiation decreased the protein level of ALKBH5 but not METTL3. n = 9, \* indicates P < 0.05, \*\* indicates P < 0.01, ns indicates not significant.

**Supplementary Fig. 3.** The results of SA- $\beta$ -gal activity detection. **a.** The SA- $\beta$ -gal activity was enhanced by ALKBH5 knockdown but not METTL3 knockdown; **b.** The SA- $\beta$ -gal activity was impaired by WT ALKBH5 but not MUT ALKBH5; **c.** WT ALKBH5 but not MUT ALKBH5 rescued the SA- $\beta$ -gal activity enhanced by H<sub>2</sub>O<sub>2</sub> treatment; **d.** WT ALKBH5 but not MUT ALKBH5 rescued the SA- $\beta$ -gal activity enhanced by UV irradiation; **e.** CYP1B1 knockdown impaired the SA- $\beta$ -gal activity and rescued the effect of ALKBH5 knockdown; **f.** The SA- $\beta$ -gal activity was enhanced by CYP1B1. n = 9, \* indicates P < 0.05, \*\* indicates P < 0.01, ns indicates not significant.

**Supplementary Fig. 4.** ALKBH5 knockdown enhanced the MFI of H2A.X. **a.** The flow cytometry detection showed the MFI of H2A.X was enhanced by ALKBH5 knockdown but not METTL3 knockdown.  $n = 9$ , \*\* indicates  $P < 0.01$ , ns indicates not significant.

**Supplementary Fig. 5.** Stable knockdown of ALKBH5 facilitated MSC senescence.

**a.** Knockdown of ALKBH5 by lentivirus increased the ratio of SA- $\beta$ -gal-positive cells; **b.** Knockdown of ALKBH5 by lentivirus increased the protein levels of p53, p21 and p16; **c.** Knockdown of ALKBH5 by lentivirus increased the percentages of G0/G1 in the cell cycle; **d.** Knockdown of METTL3 by lentivirus had no significant effect on the ratio of SA- $\beta$ -gal-positive cells; **e.** Knockdown of METTL3 by lentivirus had no significant effect on the protein levels of p53, p21 and p16; **f.** Knockdown of METTL3 by lentivirus had no significant effect on the percentages of G0/G1 in the cell cycle.  $n = 9$ , \*\* indicates  $P < 0.01$ , ns indicates not significant, scale bar = 50 nm.

**Supplementary Fig. 6.** The results of dot blot detection. **a.** Knockdown of ALKBH5 strengthened the level of m6A modification; **b.** Overexpression of ALKBH5 weakened the level of m6A modification induced by multiple replications; **c.** Overexpression of ALKBH5 weakened the level of m6A modification induced by  $H_2O_2$  treatment; **d.** Overexpression of ALKBH5 weakened the level of m6A modification induced by UV irradiation.

**Supplementary Fig. 7.** Distance profile of the m6A peaking calling and gene expression analysis of RNA-Seq. **a.** The m6A peaking callings were enriched around TSS and TES; **b.** Heatmap of differentially expressed genes in RNA-Seq; **c.** GO enrichment of differentially expressed genes in RNA-Seq; **d.** KEGG pathway

enrichment of differentially expressed genes in RNA-Seq.

**Supplementary Fig. 8.** The expression of potential downstream genes screened from MeRIP-Seq. **a.** The mRNA levels of CDK6, CCNE1, PSMC1 and PSMF1 were not changed significantly with knockdown of ALKBH5; **b.** The protein levels of CDK6, CCNE1, PSMC1 and PSMF1 were not changed significantly with knockdown of ALKBH5; **c.** WT-ALKBH5 reduced the levels of CYP1B1 mRNA but MUT-ALKBH5 had no significant effect; **d.** WT-ALKBH5 reduced the levels of CYP1B1 protein but MUT-ALKBH5 had no significant effect; **e.** CYP1B1 mRNA was precipitated by ALKBH5 antibody; **f.** ALKBH5 protein was pulled down by CYP1B1 mRNA. n = 9, \*\* indicates  $P < 0.01$ , ns indicates not significant.

**Supplementary Fig. 9.** The expression of CYP1B1 was enhanced with senescence induction. **a.** The protein level of CYP1B1 increased with cell replication; **b.** H<sub>2</sub>O<sub>2</sub> treatment increased the protein level of CYP1B1; **c.** UV irradiation increased the protein level of CYP1B1; **d.** The silencing efficiency of siRNAs targeting CYP1B1 at the mRNA and protein levels. n = 9, \* indicates  $P < 0.05$ , \*\* indicates  $P < 0.01$ , ns indicates not significant.

**Supplementary Fig. 10.** The MMP was by impaired CYP1B1. **a.** Upregulation of CYP1B1 expression impaired the ratio of polymers/monomer; **b.** Knockdown of ALKBH5 impaired the ratio of polymers/monomer and silencing CYP1B1 rescued these effects. n = 9, \*\* indicates  $P < 0.01$ , ns indicates not significant.

**Supplementary Fig. 11.** NAC and  $\beta$ -ME rescued the effect of CYP1B1 on MSC senescence. **a.** NAC (20 $\mu$ M) and  $\beta$ -ME (2mM) reduced the ratio of SA- $\beta$ -gal-positive

cells induced by CYP1B1; **b.** NAC and  $\beta$ -ME reduced the SA- $\beta$ -gal activity induced by CYP1B1; **c.** NAC and  $\beta$ -ME reduced the protein levels of p53, p21 and p16 induced by CYP1B1; **d.** NAC and  $\beta$ -ME reduced the ratio of G0/G1 induced by CYP1B1. n = 9, \*\* indicates  $P < 0.01$ , ns indicates not significant, scale bar = 50 nm.

**Supplementary Fig. 12.** Knockdown of IGF2BP2 and IGF2BP3 did not influence the expression of CYP1B1. **a.** The silencing efficiency of siRNAs targeting IGF2BP2 at the mRNA level; **b.** The silencing efficiency of siRNAs targeting IGF2BP2 at the protein level; **c.** The level of CYP1B1 mRNA was not changed significantly with knockdown of IGF2BP2; **d.** The level of CYP1B1 protein was not changed significantly with knockdown of IGF2BP3; **e.** The silencing efficiency of siRNAs targeting IGF2BP3 at the mRNA level; **f.** The silencing efficiency of siRNAs targeting IGF2BP3 at the protein level; **g.** The level of CYP1B1 mRNA was not changed significantly with knockdown of IGF2BP3; **h.** The level of CYP1B1 protein was not changed significantly with knockdown of IGF2BP3. n = 9, \* indicates  $P < 0.05$ , \*\* indicates  $P < 0.01$ , ns indicates not significant.

**Supplementary Fig. 13.** Phenotypic identification of conditional knockout mice. **a.** The electrophoresis results of PCR products of DNA extracted from mice that were amplified with specific primers for Alkbh5 (top) and Prx1-cre (bottom).

**Supplementary Fig. 14.** The expression of Alkbh5, Cyp1b1 and Mmp13 in aged mice and Prx1-Cre; Alkbh5<sup>fl/fl</sup> mice. **a.** The fluorescence signal of Alkbh5 signal was decreased in aged mice; **b.** The protein levels of Cyp1b1 were elevated and Alkbh5 were reduced in aged mice and Prx1-Cre; Alkbh5<sup>fl/fl</sup> mice; **c.** The levels of m6A

modification were enhanced in aged mice and Prx1-Cre; Alkbh5<sup>fl/fl</sup> mice; **d.** The mRNA levels of Mmp13 of the knee joint were increased in the Prx1-cre; Alkbh5<sup>fl/fl</sup> mice compared to the Alkbh5<sup>fl/fl</sup> mice; **e.** The protein levels of Mmp13 of the knee joint were increased in the Prx1-cre; Alkbh5<sup>fl/fl</sup> mice compared to the Alkbh5<sup>fl/fl</sup> mice; **f.** Intra-articular injection of C-MSCs reduced the mRNA levels of Mmp13 and O-MSCs had a better effect; **g.** Intra-articular injection of C-MSCs reduced the protein levels of Mmp13 and O-MSCs had a better effect. n = 6, \* indicates P < 0.05, \*\* indicates P < 0.01, ns indicates not significant.
